# Supplementary material for: LEM domain containing 1 promotes thyroid cancer cell proliferation and migration by activating the Wnt/β-catenin signaling pathway and epithelial-mesenchymal transition
Source: PubMed Central journal article supplement — Oncol Lett. 2021 Apr 2;21(6):442. doi: 10.3892/ol.2021.12703 (PMC8045170; doi:10.3892/ol.2021.12703), 2021-04-02
Supplement: Supplementary_Data.pdf [file Supplementary_Data.pdf]

Table SI. LEMD1 gene expression in 79 cases of papillary thyroid carcinoma compared with normal tissues by whole transcriptome sequencing.

| Sample     | RN-counts | RT-counts | Log <sub>2</sub> ratio (RT/RN) | RT/RN |
|------------|-----------|-----------|--------------------------------|-------|
| 1 548811   | 31        | 123       | 1.988318195                    | Up    |
| 2 1152603  | 22        | 131       | 2.573991383                    | Up    |
| 3 1153453  | 25        | 135       | 2.432959407                    | Up    |
| 4 1253638  | 18        | 141       | 2.969626351                    | Up    |
| 5 1267375  | 13        | 98        | 2.914270126                    | Up    |
| 6 1267409  | 27        | 152       | 2.493040011                    | Up    |
| 7 1270716  | 15        | 0         | No value                       | Down  |
| 8 1272241  | 32        | 149       | 2.21916852                     | Up    |
| 9 1272253  | 32        | 416       | 3.700439718                    | Up    |
| 10 1281991 | 33        | 53        | 0.683526335                    | Up    |
| 11 1281995 | 23        | 186       | 3.015596855                    | Up    |
| 12 1283215 | 48        | 360       | 2.906890596                    | Up    |
| 13 1284199 | 15        | 415       | 4.790076931                    | Up    |
| 14 1287396 | 33        | 329       | 3.317549654                    | Up    |
| 15 1291231 | 38        | 63        | 0.72935241                     | Up    |
| 16 1292042 | 48        | 137       | 1.513069582                    | Up    |
| 17 1295541 | 47        | 130       | 1.467778961                    | Up    |
| 18 1295762 | 14        | 281       | 4.327071398                    | Up    |
| 19 1297226 | 21        | 195       | 3.215012891                    | Up    |
| 20 1302325 | 79        | 171       | 1.114071767                    | Up    |
| 21 1309208 | 10        | 90        | 3.169925001                    | Up    |
| 22 1316314 | 40        | 376       | 3.232660757                    | Up    |
| 23 1317299 | 23        | 219       | 3.251225104                    | Up    |
| 24 1318404 | 21        | 8         | -1.392317423                   | Down  |
| 25 1320021 | 30        | 291       | 3.277984747                    | Up    |
| 26 1326980 | 100       | 428       | 2.097610797                    | Up    |
| 27 1327632 | 174       | 46        | -1.91938154                    | Down  |
| 28 1329390 | 28        | 79        | 1.496425826                    | Up    |
| 29 1331954 | 6         | 35        | 2.544320516                    | Up    |
| 30 1335161 | 22        | 158       | 2.84434913                     | Up    |
| 31 1335945 | 84        | 60        | -0.485426827                   | Down  |
| 32 1338955 | 66        | 14        | -2.237039197                   | Down  |
| 33 1341742 | 35        | 57        | 0.703606997                    | Up    |
| 34 1342937 | 35        | 93        | 1.409875794                    | Up    |
| 35 1344535 | 7         | 135       | 4.269460675                    | Up    |
| 36 1345729 | 22        | 168       | 2.932885804                    | Up    |
| 37 1348236 | 54        | 159       | 1.557995453                    | Up    |
| 38 1350077 | 24        | 133       | 2.470319935                    | Up    |
| 39 1353199 | 14        | 159       | 3.505528033                    | Up    |
| 40 1356177 | 42        | 198       | 2.237039197                    | Up    |
| 41 1359874 | 19        | 202       | 3.410283969                    | Up    |
| 42 1360052 | 28        | 600       | 4.421463768                    | Up    |
| 43 1363999 | 9         | 37        | 2.039528364                    | Up    |
| 44 1364219 | 48        | 82        | 0.772589504                    | Up    |
| 45 1365307 | 66        | 82        | 0.313157885                    | Up    |
| 46 1365657 | 8         | 14        | 0.807354922                    | Up    |
| 47 1366593 | 46        | 145       | 1.656347134                    | Up    |
| 48 1368574 | 69        | 258       | 1.902702799                    | Up    |
| 49 1370585 | 26        | 125       | 2.265344567                    | Up    |
| 50 1372096 | 40        | 89        | 1.153805336                    | Up    |
| 51 1374256 | 25        | 37        | 0.565597176                    | Up    |
| 52 1374809 | 10        | 360       | 5.169925001                    | Up    |
| 53 1375934 | 38        | 129       | 1.763299742                    | Up    |
| 54 1376040 | 19        | 87        | 2.195015982                    | Up    |
| 55 1376519 | 72        | 206       | 1.516575526                    | Up    |
| 56 1382525 | 27        | 177       | 2.712718048                    | Up    |
| 57 1382636 | 38        | 198       | 2.381429107                    | Up    |
| 58 1385076 | 29        | 194       | 2.741931847                    | Up    |

Table SI. Continued.

| Sample     | RN-counts | RT-counts | Log <sub>2</sub> ratio (RT/RN) | RT/RN |
|------------|-----------|-----------|--------------------------------|-------|
| 59 1385097 | 70        | 83        | 0.245756414                    | Up    |
| 60 1391191 | 33        | 66        | 1                              | Up    |
| 61 1392926 | 22        | 282       | 3.680119734                    | Up    |
| 62 1397219 | 21        | 11        | -0.932885804                   | Down  |
| 63 1401189 | 12        | 9         | -0.415037499                   | Down  |
| 64 1401703 | 8         | 62        | 2.95419631                     | Up    |
| 65 1402293 | 54        | 51        | -0.08246216                    | Down  |
| 66 1404580 | 29        | 149       | 2.361187525                    | Up    |
| 67 1406830 | 10        | 95        | 3.247927513                    | Up    |
| 68 1411217 | 28        | 136       | 2.280107919                    | Up    |
| 69 1411427 | 28        | 112       | 2                              | Up    |
| 70 1411753 | 53        | 126       | 1.249359469                    | Up    |
| 71 1412603 | 29        | 254       | 3.130703692                    | Up    |
| 72 1412613 | 28        | 43        | 0.618909833                    | Up    |
| 73 1414100 | 19        | 100       | 2.395928676                    | Up    |
| 74 1417564 | 131       | 54        | -1.278535499                   | Down  |
| 75 1418404 | 40        | 139       | 1.797012978                    | Up    |
| 76 1418978 | 51        | 333       | 2.706953025                    | Up    |
| 77 1421725 | 44        | 210       | 2.254813899                    | Up    |
| 78 1426566 | 29        | 87        | 1.584962501                    | Up    |
| 79 1430045 | 17        | 35        | 1.041820176                    | Up    |

RN, RNA normal tissues; RT, RNA tumor tissues.
